# Supplementary material for: Time course analysis of RNA stability in human placenta
Source: PubMed Central journal article supplement (PMC2664811; doi:10.1186/1471-2199-10-21), 2009-03-10

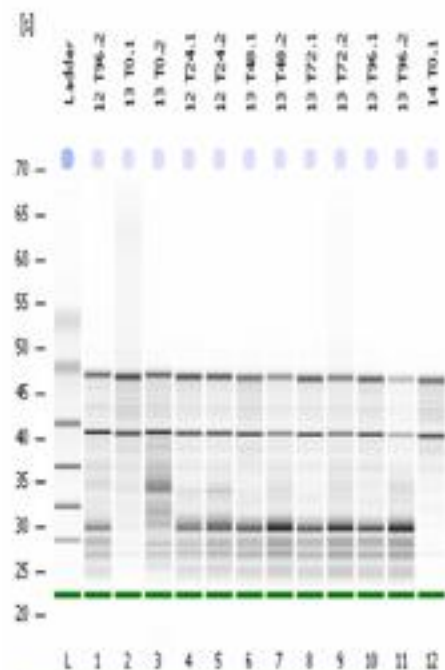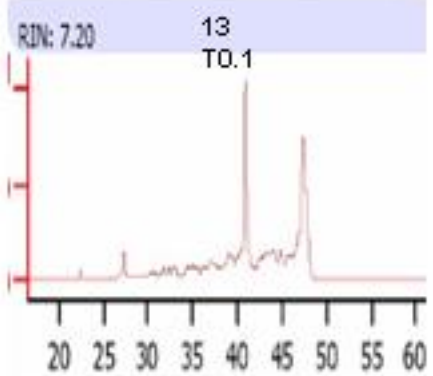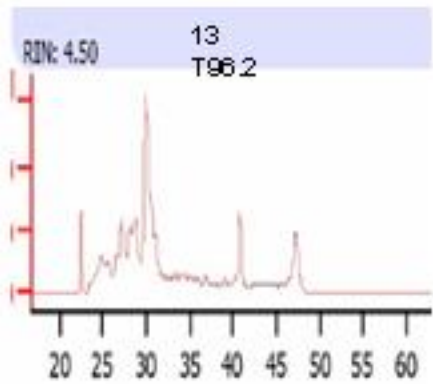

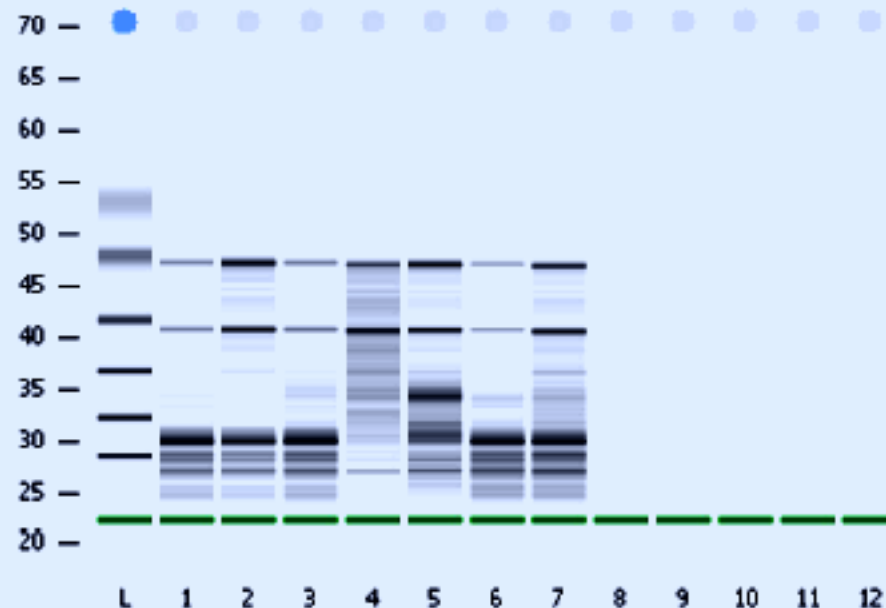

Assay Information:

Assay Origin Path: C:\Program Files\Agilent\2100 bioanalyzer\2100 expert\assays\RNA\Eukaryote Total RNA Nano Series II.xsy  
 Title: Eukaryote Total RNA Nano Series II  
 Version: 2.5  
 Assay Comments: Copyright © 2003-2006 Agilent Technologies

Chip Information:

Chip Lot:  
 Reagent Kit Lot:  
 Chip Comments:

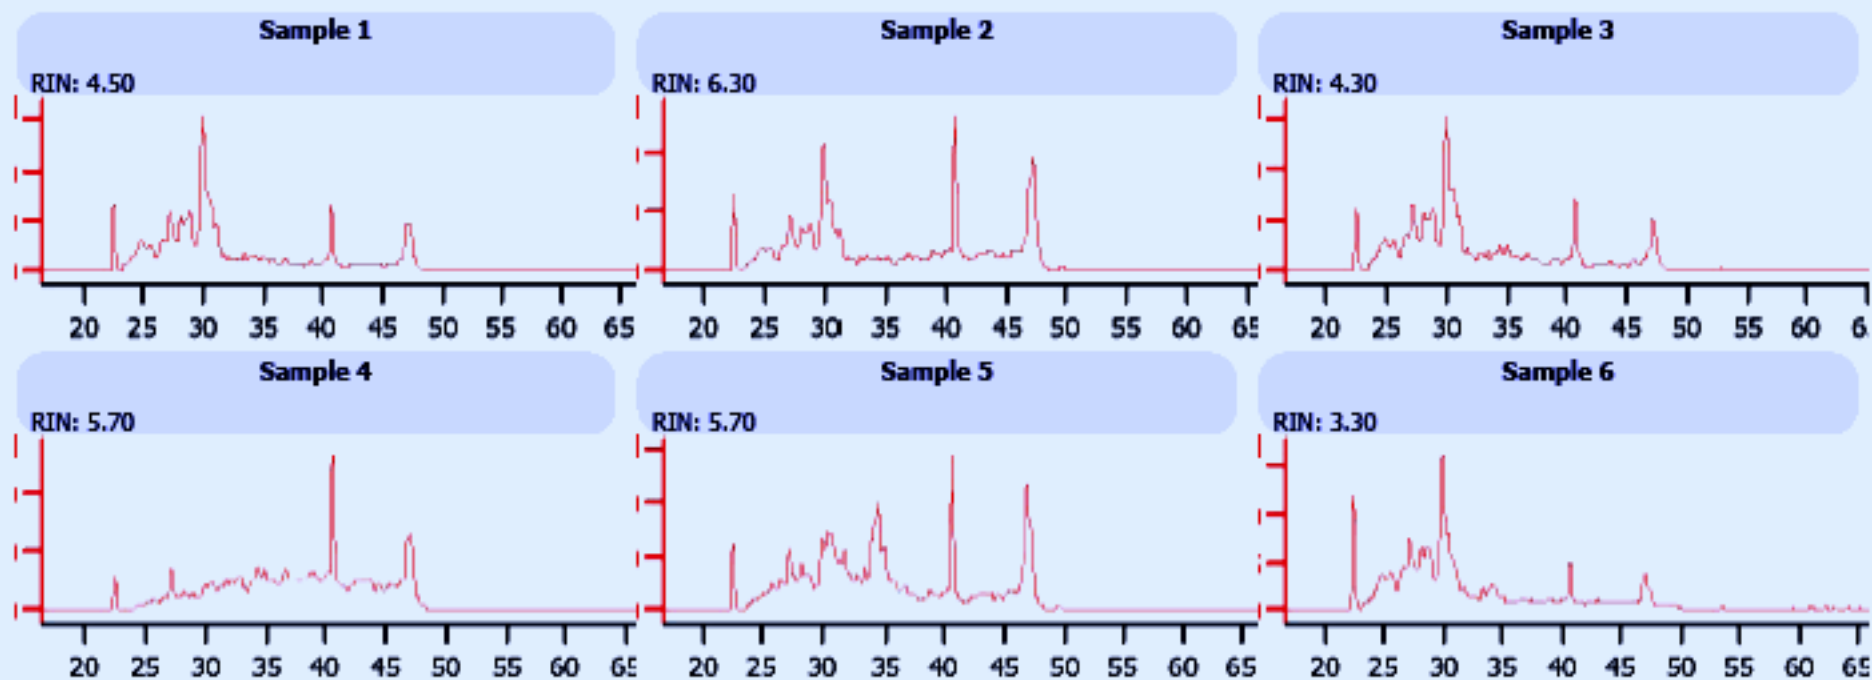

Supplement: 1471-2199-10-21-S1.pdf [file 1471-2199-10-21-S1.pdf]
